# Supplementary material for: Evaluation of DNA Methylation Profiles of LINE-1, Alu and Ribosomal DNA Repeats in Human Cell Lines Exposed to Radiofrequency Radiation
Source: MDPI journal article supplement (doi:10.3390/ijms24119380), 2023-05-27
Supplement: s1 [file s1]

**Figure S2.** Genomic sequences of rDNA, LINE-1 and Alu amplicons. List of genomic sequences amplified by rDNA, LINE-1 and Alu amplicons assayed through target-bisulfite sequencing. CpGs are highlighted and identified via their relative position within each amplicon.

### >18S1

4 24 30 45 52  
 TAGCCGTTTCTCAGGCTCCCTCTCCGGAATCGAACCCTGATTCCCCGTCACCCGTGGTCACCATGGTAGGCA  
 72 75 85 104 108 117 120 123 128 135 139  
 CGGCGACTACCATCGAAAGTTGATAGGGCAGACGTTCGAATGGGTGTCGCGCCACCGGGGGGCGTGCGA  
 143 148 173 176 179 183 190 194 200  
 TCGGCCCGAGGTTATCTAGAGTCACCAAAGCCGCCGCGCCCGCCCCCGGCCCGGGGCGCGAGAGGGGCT  
 215 242  
 GACCGGGTTGGTTTGTATCTGATAAATGCACG

### >28S

29 56 62  
 GTATTTAGCCTTAGATGGAGTTTACCACCCGCTTTGGGCTGCATTCCCAAGCAACCCGACTCCGGAAGACC  
 72 78 81 83 86 93 99 110 116 128  
 CGGGCCCGGCGCGCGGGGGCCGCTACCGGCCTCACACCGTCCACGGCTGGGCCTCGATCAGAAGGACT  
 153 157 160 163 170 179 183 195 197 202 205 207  
 TGGGCCCCCAGAGCGGCGCGGGGAGCGGGTCTTCGTACCGCCACATGTCCCGCGCCCCCGCGCGGGG  
 212 220 223 246 249  
 CGGGGATTCGGCGCTGGGCTCTTCCTGTTCACTCGCGTTACTGAGGGAATCCTGGTTAGTT

### >Alu

26 30 38 40 42 62  
 TCTCTACTAAAAATACAAAAATTAGCCGGGCGTGGTGGCGCGCGCCTGTAATCCCAGCTACTCGGGAGGCT  
 84 94 101 118 124 126  
 GAGGCAGGAGAATCGCTTGAACCGGGAGGCGGAGGTTGCAGTGAGCCGAGATCGCGCCACTGCACTCC  
 AGCCTGG

### >LINE-L1

27. 34. 37 49 61 70  
 CTCTGAGCCAGGTGTGGGATATAGTCTCGTGGTGCGCCGTTTCTTAAGCCGCTGTAAGGCGCAATATTC  
 85 99 103 123  
 GGGTGGGAGTGACCCGATTTTCCAGGTGCGTCGTCACCCCTTTCTTTGACTCGGAAAGGGAACCTCCTGA  
 149 173 183 188 190 194 199  
 CCCCTTGCGCTTCCCAGGTGAGGCAATGCCTCGCCCTGCTCGGCTCGCGCACCGGTGCGCACACACTGG  
 217  
 CCTGCGCCCACTGTCTGGCACTCCCTAGTGAG

### >RiboProm1

5 27 36 38 42 50 59 65  
 GTCCCCTGTGTAGCTAGGCAGAGCTCCGGAAGCCCGCGGTGTCAGCCCGGCTGGCCCGGTGGCGCCA  
 79 81 84 106 135  
 GAGCTGTGGCGCGTCTTGTGAGTCACAGCTCTGGCGTGCAGGTTTATGTGGGGGAGAGGCTGTCTGCTG  
 140 152 154 157 161 173 178 182 189 191 194 203  
 CGCTTCTGGGCCCGCGGCGGGCGTGGGGCTGCCCGGGCCGCGTCCGACCAGCGCGCGTAGCTCCCGAGGCC  
 210 215 217 222 224 232 232 235 237 244 246 260  
 CGAGCCCGCGACCCCGCGGGGACCCGCGCGCGTGGCGCGGGAGGCTGGGGACGCCCTTCC

>RiboProm2

GTGTCCTTGGGTTGACCAGAGGGCCC<sup>26</sup>CG<sup>30</sup>GG<sup>35</sup>CGCTC<sup>47</sup>CGTGTGTGGCTG<sup>56</sup>CGATGGTGG<sup>56</sup>CGTTTTTGGGGACA  
GGTGT<sup>76</sup>CG<sup>81</sup>TGT<sup>83</sup>CG<sup>85</sup>CG<sup>88</sup>CGCCTGGGC<sup>97</sup>CG<sup>100</sup>CG<sup>103</sup>GCGTGGT<sup>109</sup>CGGTGA<sup>115</sup>CG<sup>117</sup>CGACCTCC<sup>125</sup>CG<sup>131</sup>GGGGGAG  
GTATATCTTT<sup>149</sup>CG<sup>154</sup>CTC<sup>159</sup>CGAGT<sup>172</sup>CG<sup>175</sup>GCATTTTGGGCC<sup>172</sup>CG<sup>175</sup>GGTTATTGCTGACA<sup>191</sup>CGCTGTCCTCTGG<sup>204</sup>CGACCTG  
<sup>212</sup>  
T<sup>212</sup>CGCTGGAGAGGTTGGGCCTTGGGATG
