# Supplementary material for: Evaluation of DNA Methylation Profiles of LINE-1, Alu and Ribosomal DNA Repeats in Human Cell Lines Exposed to Radiofrequency Radiation
Source: MDPI journal article supplement (doi:10.3390/ijms24119380), 2023-05-27
Supplement: s1 [file s1]

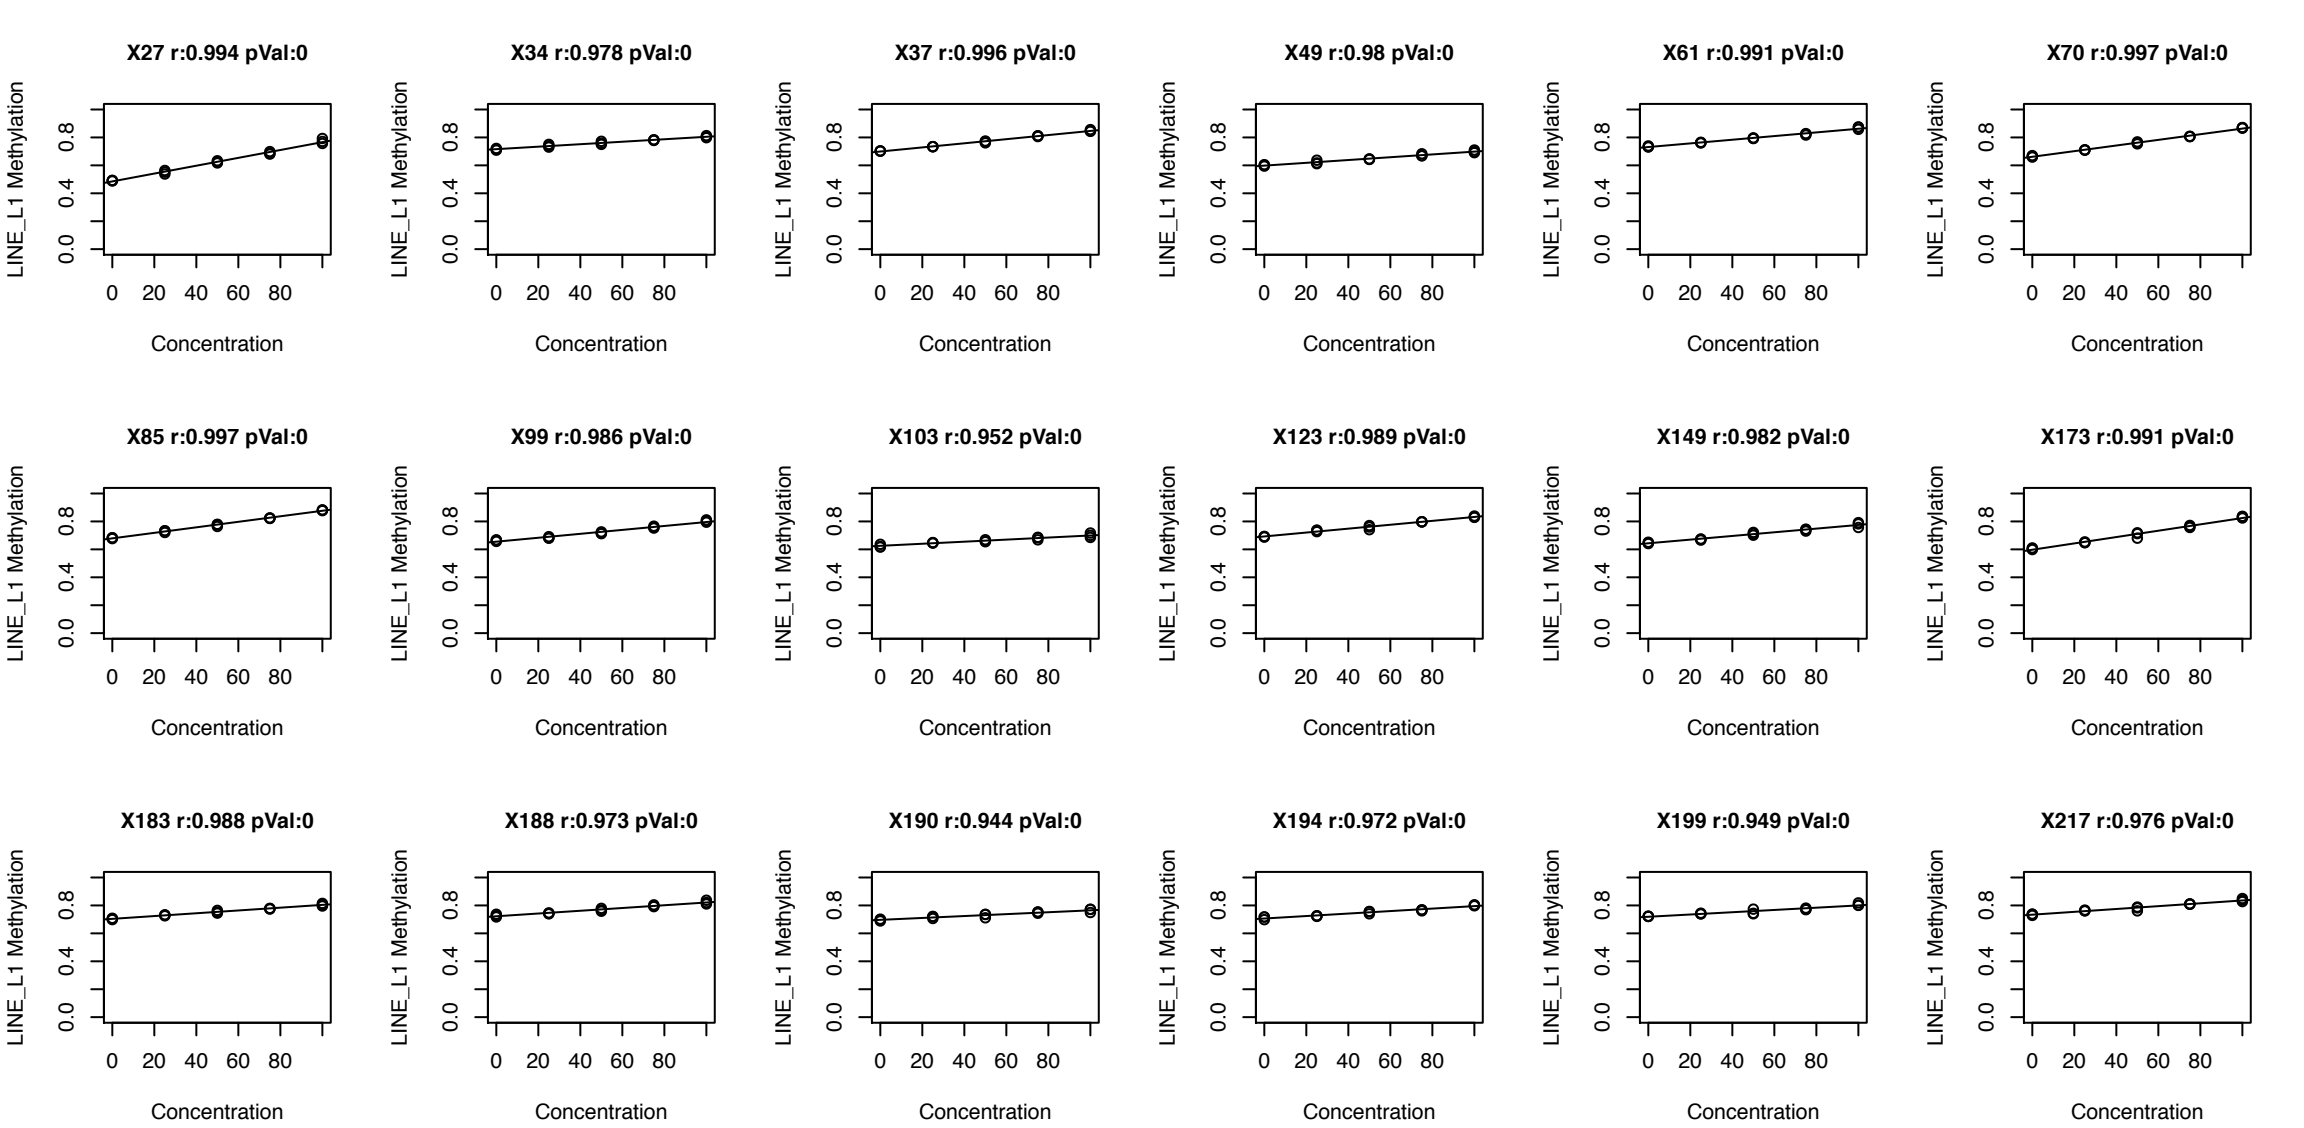

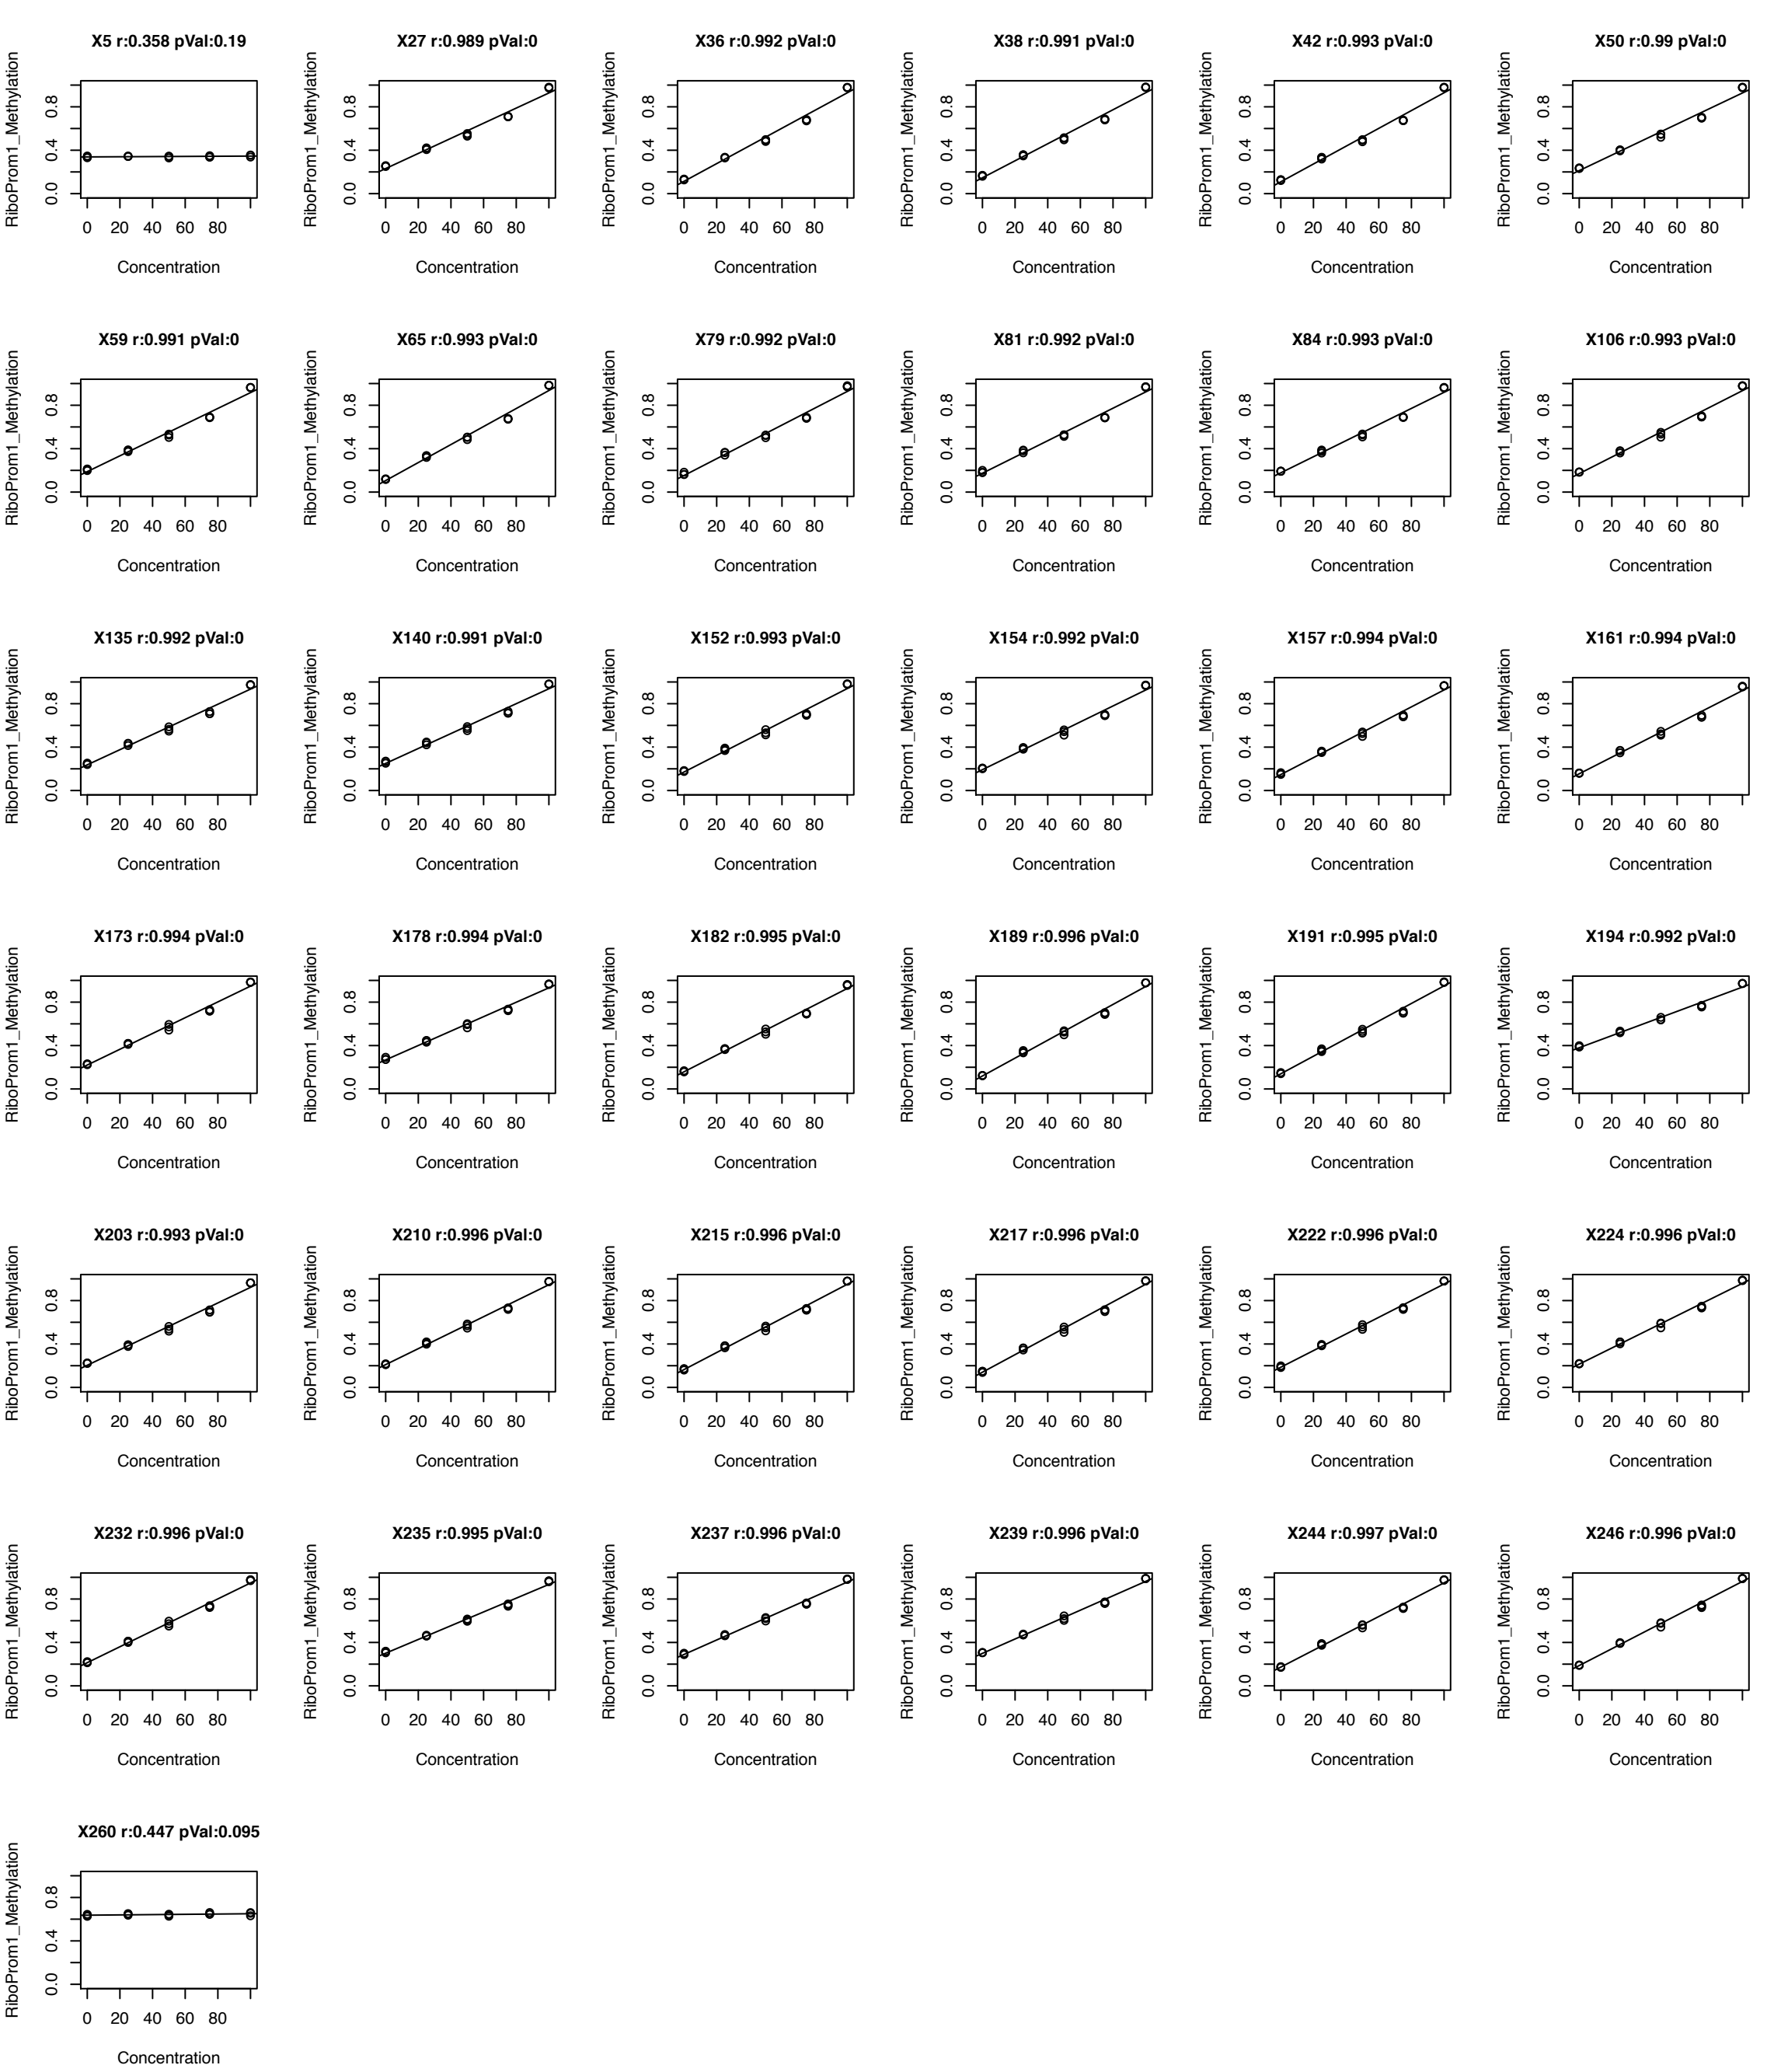



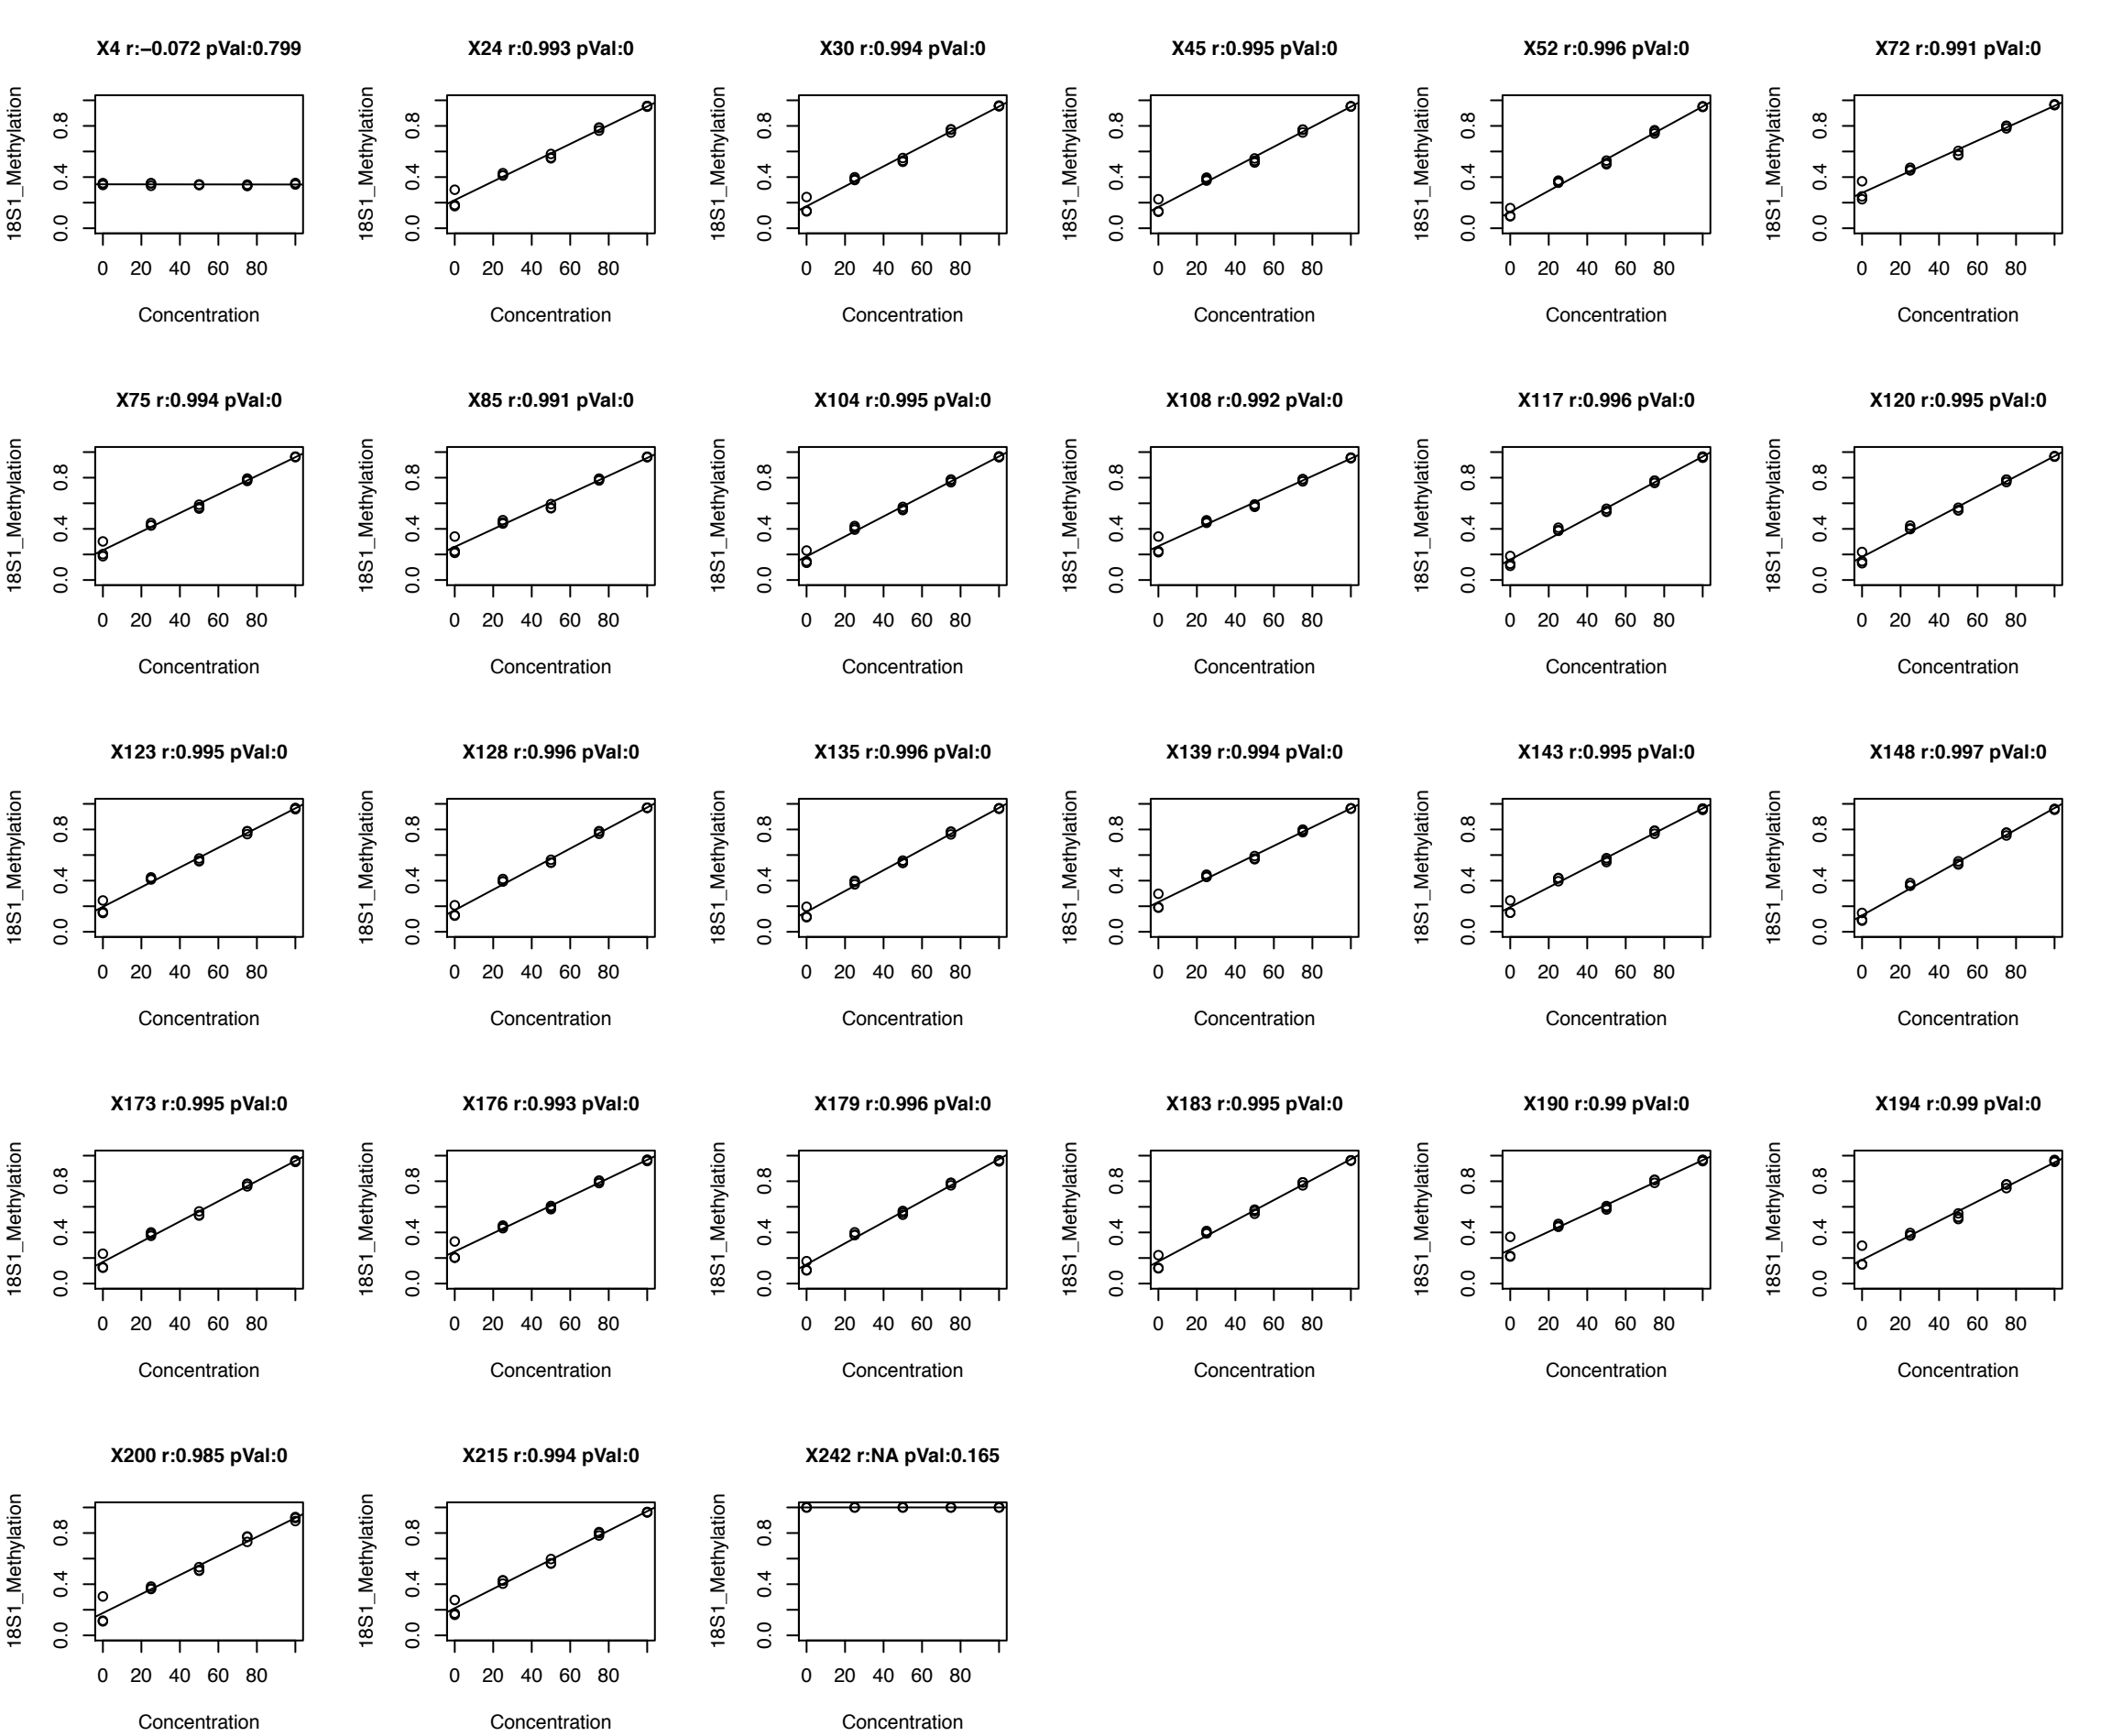

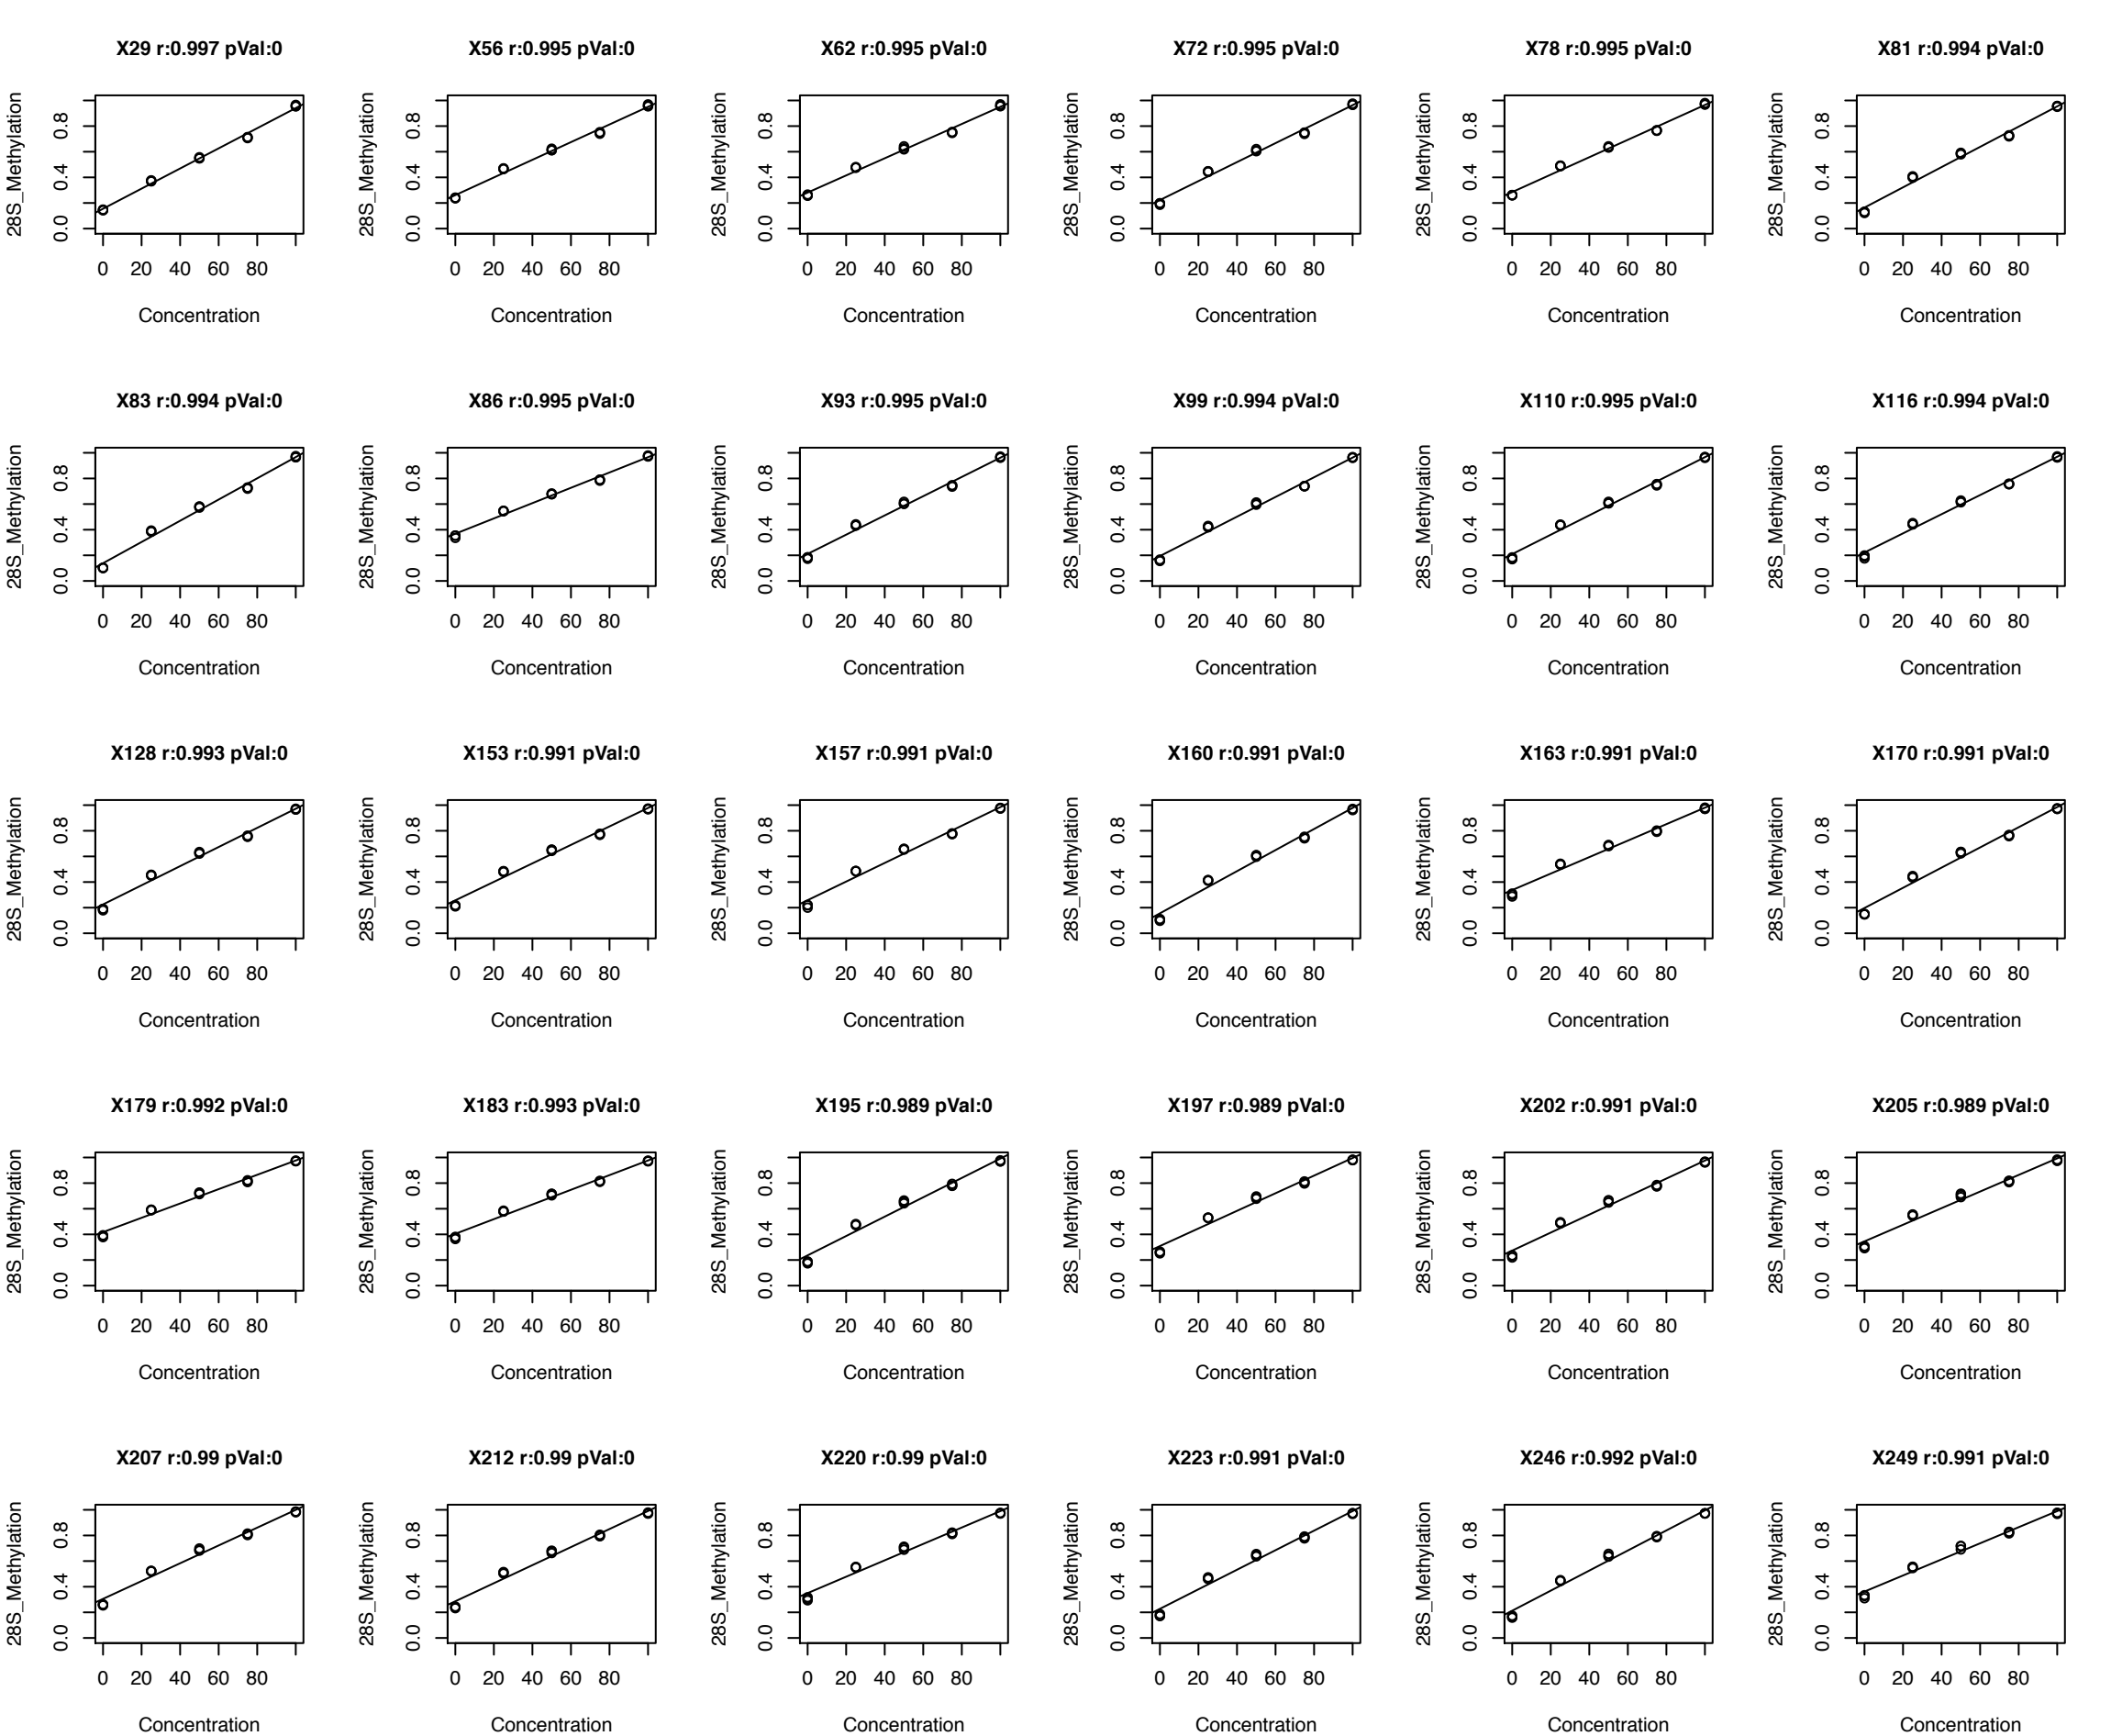

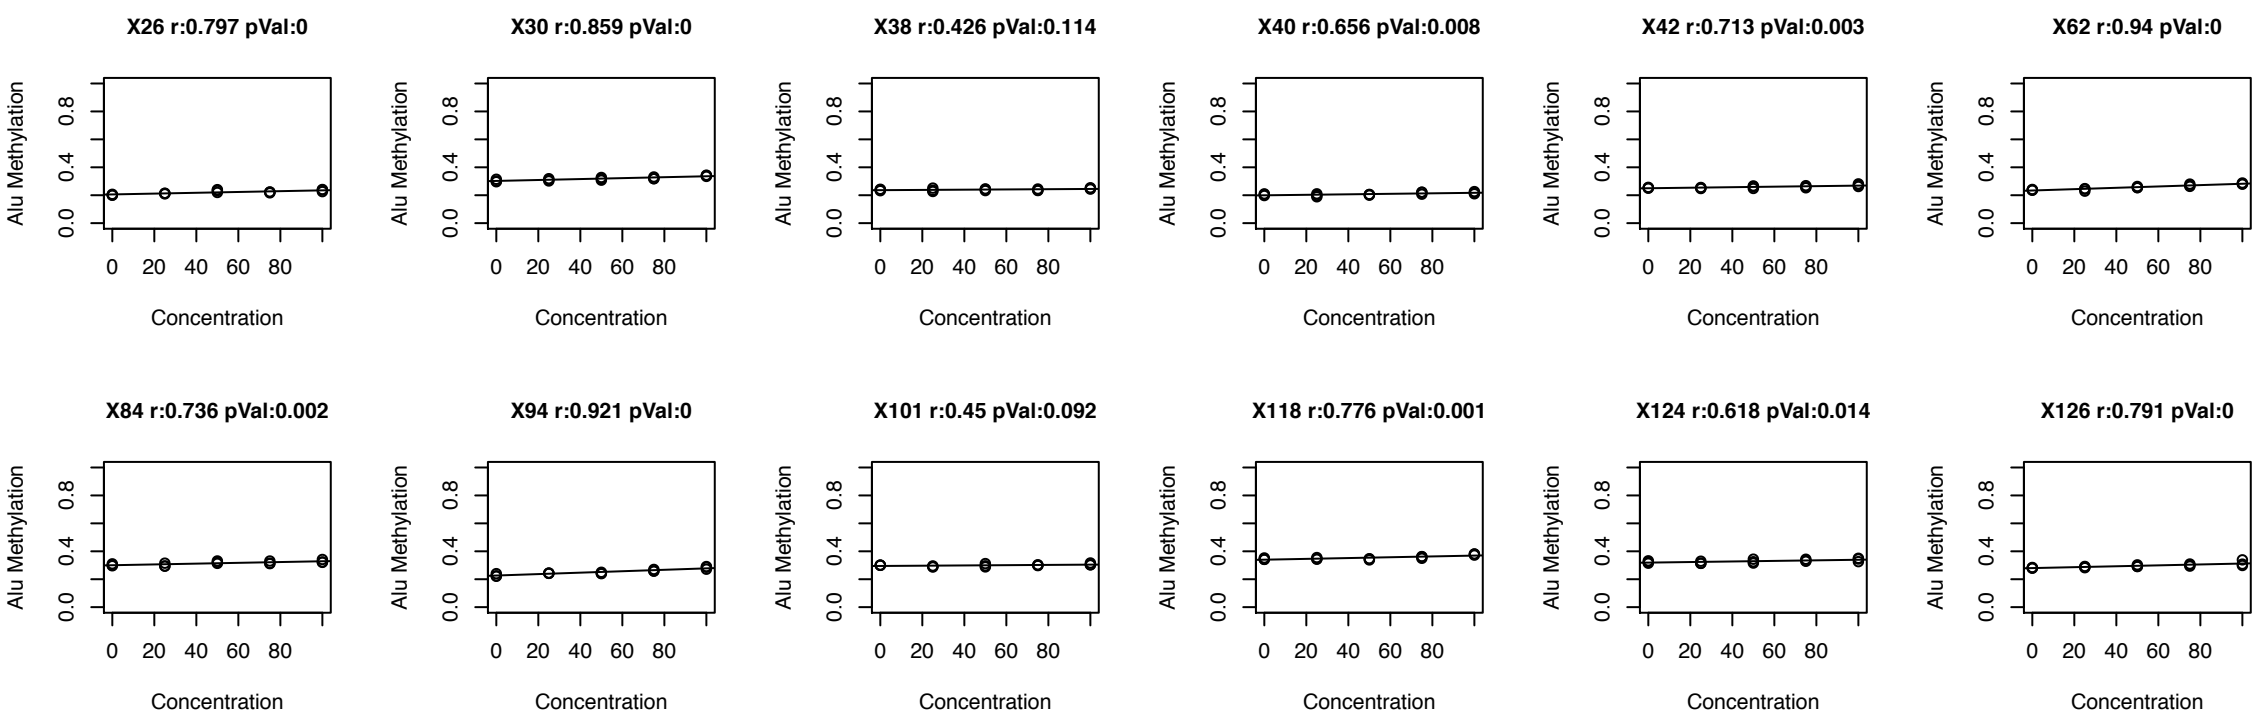

**Figure S1.** DNAm calibration curves for rDNA, LINE1 and Alu targets. Plots reporting DNAm profiles for rDNA, LINE1 and Alu amplicons assessed using calibrator samples at increasing DNAm percentages (0%, 25%, 50%, 75%, 100%). Calibration curves are obtained through linear regression between measured DNAm levels and expected ones. r-value = Spearman correlation coefficient; p-value = linear regression statistical significance coefficient.
